# Supplementary material
Source: PubMed Central journal article supplement (PMC3104763)
Supplement: JCI45942sd.pdf [file JCI45942sd.pdf]

**A**

5 days post injection

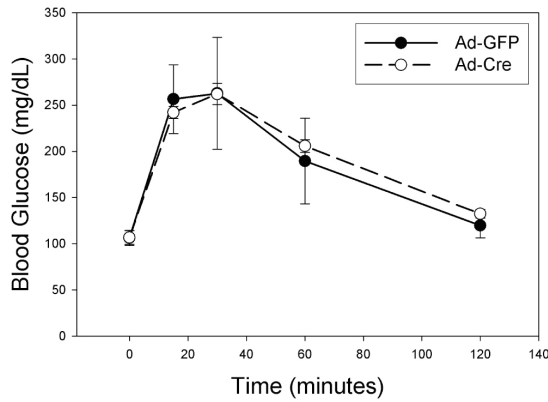**B**

11 days post injection

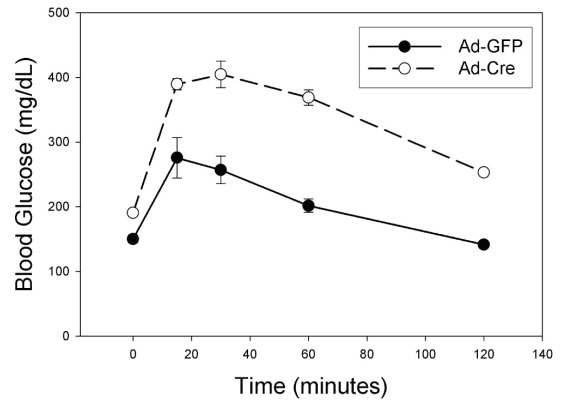**C**

14 days post injection

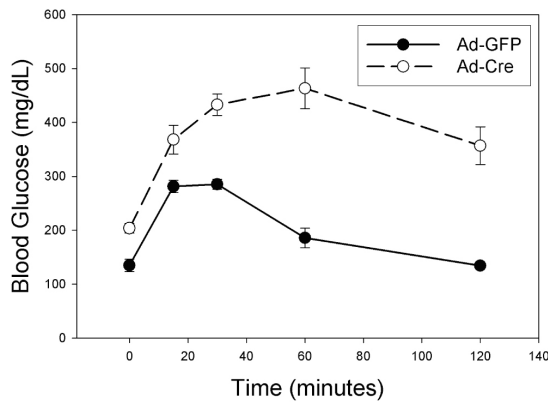**D**

75 days post injection

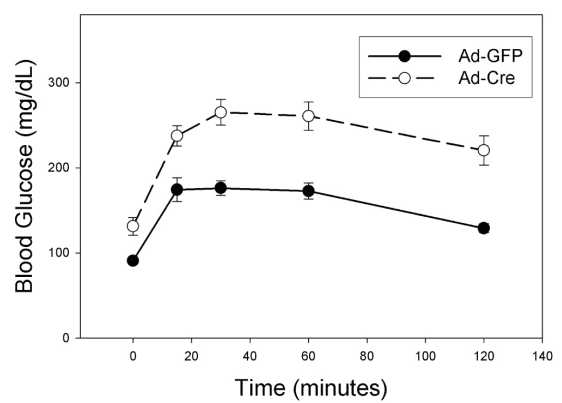

**Supplemental Figure 1. Glucose tolerance tests in virus-infected *LKB1<sup>lox/lox</sup>* mice.** *LKB1<sup>lox/lox</sup>* mice were infected with either Ad-GFP or Ad-Cre and after the indicated times were fasted for 6 hours and injected with 1 g/kg bw glucose. Blood glucose was followed for 2 hours.

A

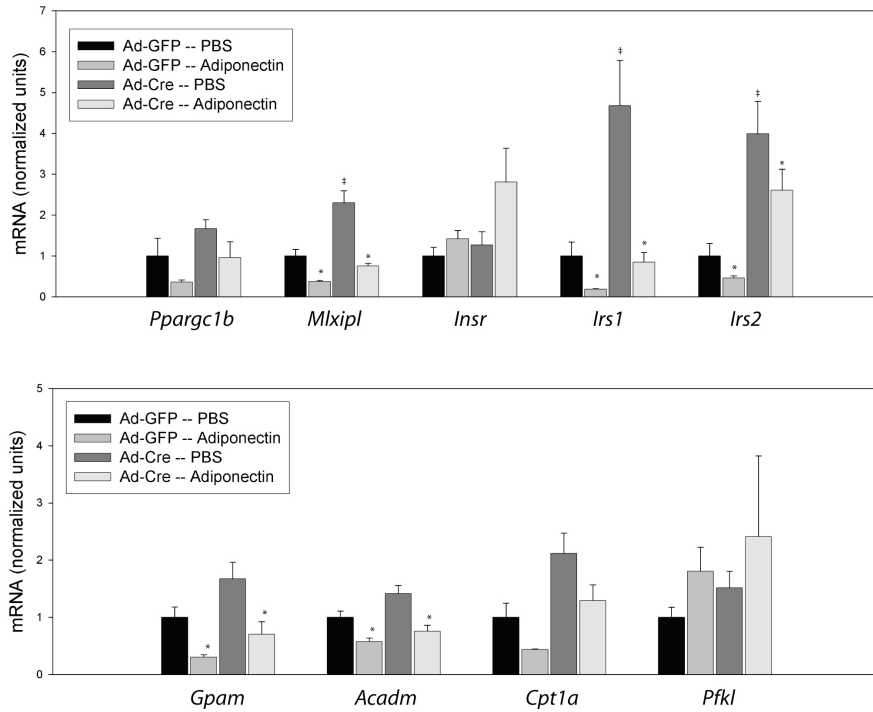

B

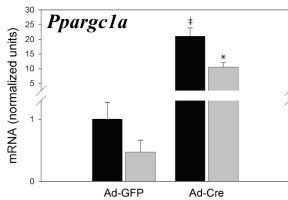

C

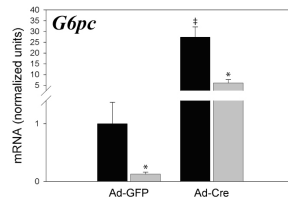

D

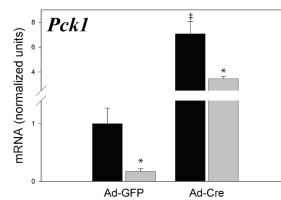

**Supplemental Figure 2. Adiponectin induced gene expression following adiponectin tolerance test is not LKB1 dependent.** **A.** Adenovirus infected *LKB1<sup>lox/lox</sup>* mice were injected intraperitoneally with PBS or 34  $\mu$ g/g body weight adiponectin and 6 hours later their livers were collected for RNA analysis. The indicated mRNAs were quantified and expressed relative to *Tbp* mRNA levels. The data are represented normalized to the GFP-infected, PBS-injected group. **B-D.** Adenovirus infected *LKB1<sup>lox/lox</sup>* mice were clamped at euglycemia as indicated in Methods section, and infused with either PBS or 50 ng/min/g body weight of adiponectin. Following experiment, livers were collected for mRNA analysis. **B.** *Pparg1a*, **C.** *G6pc*, and **D.** *Pck1* mRNA were quantified and expressed relative to *Cyp1a* mRNA levels. The data are represented normalized to the GFP-infected, PBS-injected group. For **D.-F.** the inset bar shows the effect of adiponectin regulation on Ad-GFP treated mice. \* = p < 0.05 PBS vs adiponectin, ‡ = p < 0.05 GFP vs Cre

**A**

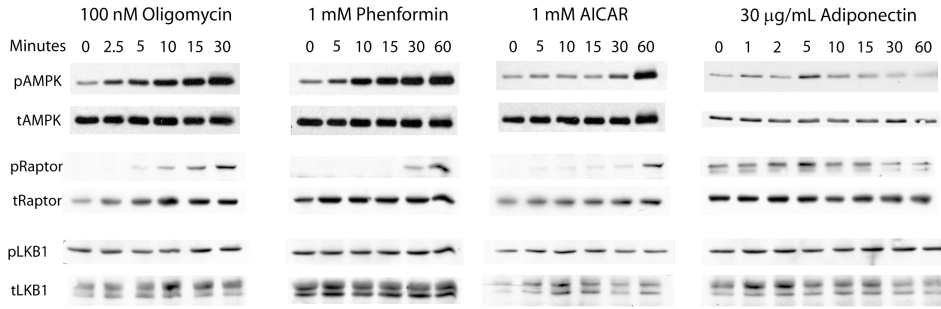

**B**

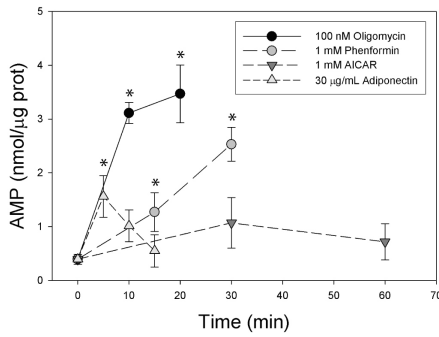

**C**

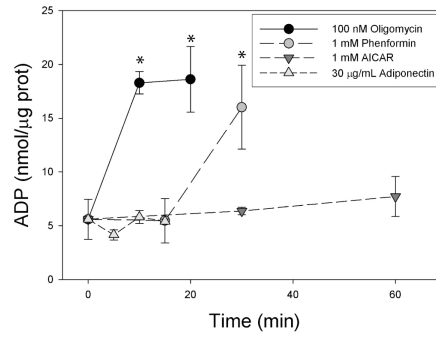

**D**

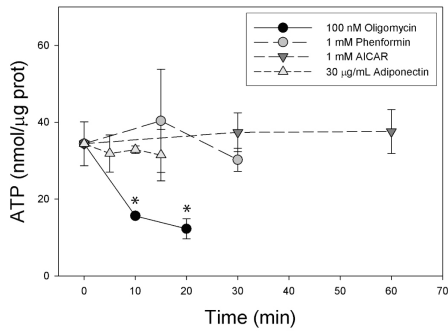

**E**

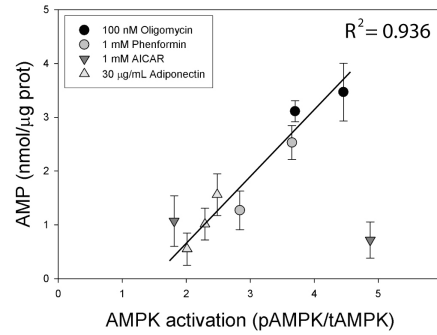

**Supplemental Figure 3. Adiponectin-stimulated AMPK phosphorylation parallels increases in total cellular AMP.** Western blots of phosphorylated (T172) and total AMPK, phosphorylated (T428) and total LKB1, and phosphorylated (S792) and total Raptor, showing the time course following addition of 100 nM Oligomycin, 1 mM Phenformin, 1 mM AICAR, or 30 μg/mL adiponectin. **B-D.** Quantification of total cellular **B.** AMP, **C.** ADP, and **D.** ATP from wild type primary hepatocytes treated with the indicated concentrations of AMPK activators. **E.** Comparison of cellular AMP levels and quantification of pT172 AMPK/total AMPK shows an apparent linear correlation between all activators tested except AICAR, which is mediated through ZMP production and not AMP. \* =  $p < 0.05$  vs. untreated hepatocyte nucleotide levels.

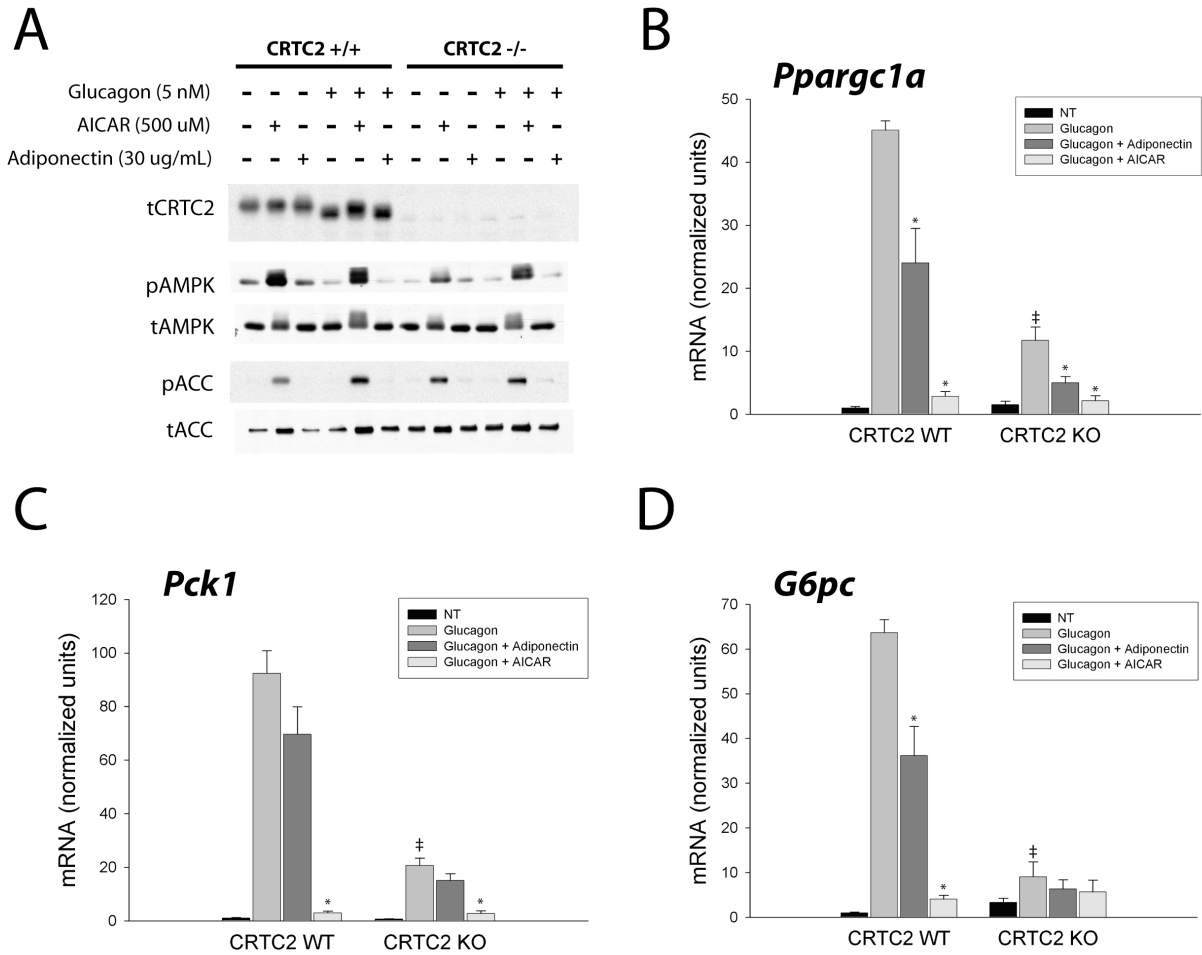

**Supplemental Figure 4. Adiponectin signaling in CRTC2 null primary hepatocytes.**

**A.** Primary hepatocytes isolated from CRTC2 +/+ and CRTC2 -/- mice were treated with 30  $\mu$ g/mL adiponectin, 500  $\mu$ M AICAR, and 5 nM glucagon for 6 hours and probed for CRTC2 (tCRTC2), phosphorylated and total AMPK (pAMPK and tAMPK), and phosphorylated and total ACC (pACC and tACC). **B-D.** Primary hepatocytes isolated from CRTC2 +/+ and CRTC2 -/- mice were treated with 30  $\mu$ g/mL adiponectin, 500  $\mu$ M AICAR, and 100  $\mu$ M dibutyryl cAMP for 6 hours and total RNA was isolated and **B.** *Ppargc1a*, **C.** *Pck1*, and **D.** *G6pc* mRNA was quantified and expressed relative to Cyclophilin A mRNA and normalized to basal mRNA from GFP infected hepatocytes. \* =  $p < 0.05$  vs glucagon, ‡ =  $p < 0.05$  CRTC2 +/+ vs CRTC2 -/-

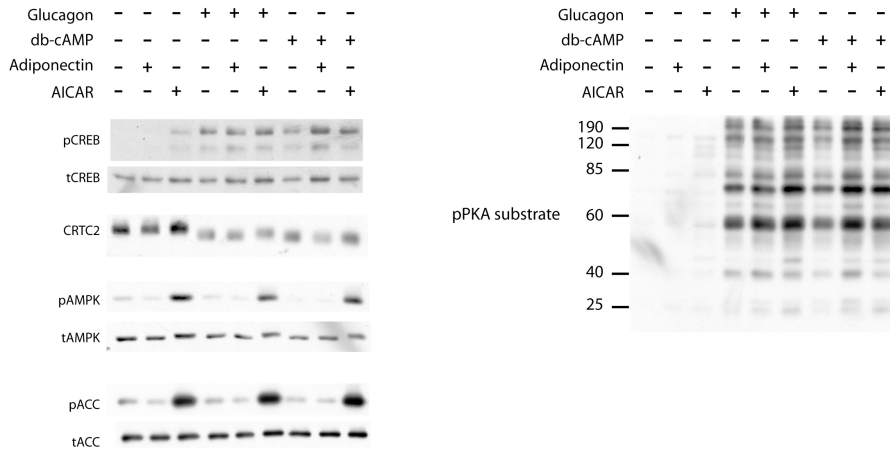

**Supplemental Figure 5. Western blot showing adiponectin and AICAR do not inhibit db-cAMP or glucagon induced PKA activity.** Primary hepatocytes were isolated from fed mice and plated on collagen coated 6 well plates in M199 media over night. Cells were stimulated with 5 nM Glucagon, 50  $\mu$ M db-cAMP, 30  $\mu$ g/mL Adiponectin, or 250  $\mu$ M AICAR for 4 hours. Total protein was isolated and probed by western blot for phosphorylated and total CREB, phosphorylated and total AMPK, phosphorylated and total ACC, and proteins reactive with the phosphoPKA substrate antibody.

**A**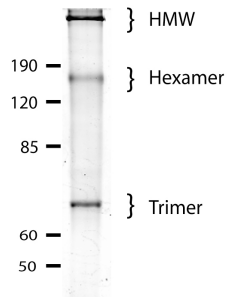

Non-reducing SDS-PAGE

**B**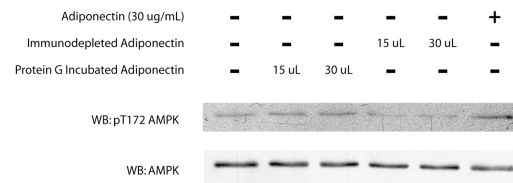

**Supplemental Figure 6. Molecular composition of recombinant adiponectin.** **A.** A representative adiponectin preparation was electrophoresed under non-reducing SDS-PAGE conditions to determine the molecular weight forms present in preparations used for all studies. **B.** Immunodepletion of adiponectin with anti-adiponectin antibody removes AMPK-activating ability.
